# Supplementary material
Source: PubMed Central journal article supplement (PMC2941002)
Supplement: mmc1.pdf [file mmc1.pdf]

Biophysical Journal, Volume 99

Supporting Material

**Measurement of the Attachment and Assembly of Small Amyloid- $\beta$  Oligomers on Live Cell Membranes at Physiological Concentrations Using Single-Molecule Tools**

Suman Nag, Jiji Chen, J. Irudayaraj, and S. Maiti

# MEASUREMENT OF THE ATTACHMENT AND ASSEMBLY OF SMALL AMYLOID- $\beta$ OLIGOMERS ON LIVE CELL MEMBRANES AT PHYSIOLOGICAL CONCENTRATIONS USING SINGLE MOLECULE TOOLS

Suman Nag<sup>1</sup>, Jiji Chen<sup>2,3</sup>, J. Irudayaraj<sup>2,3</sup> and S. Maiti<sup>1\*</sup>

<sup>1</sup> Department of Chemical Sciences Tata Institute of Fundamental Research, Colaba, Mumbai, India.

<sup>2</sup> Department of Agricultural and Biological Engineering and <sup>3</sup> Bindley Bioscience Center, Purdue University, West Lafayette, IN, USA.

\* Email: [maiti@tifr.res.in](mailto:maiti@tifr.res.in)

## Figure Legends

**Figure S1. Fluorescence lifetime of fluorescein-labeled A $\beta$  on cell membranes.** Time Correlated Single Photon Counting measurement of the fluorescence lifetime of 150 nM (circle) and 350 nM A $\beta$  (star) obtained from the cell membrane, with their corresponding bi-exponential fits (black, 150 nM) and grey, 350nM). The fit of the 150 nM sample yields lifetimes of 1.3 ns (44%), and 4.1 ns (56%), whereas for the 350 nM sample the lifetimes are 1.2 ns (34%) and 4.2 ns (66%).

**Figure S2. Photon Counting Histogram analysis of fluorescein labeled A $\beta$  on the cell membrane and in the extracellular solution.** Photon count distribution (with 10  $\mu$ s time binning) of labeled A $\beta$  in solution (filled circles) and on cell membrane (open circles) with their corresponding one component fits (solid line). The brightness per molecule is about 5.3 KHz in the membrane as compared to 18.7 KHz in the solution, which indicates quenching of the fluorophores in the membrane. The membrane data, when binned for 100  $\mu$ s, fits better with trace amounts of a second component which is about 30 times brighter, suggesting the presence of aggregates (not shown).

**Figure S3. Measuring the viscosity of the cell membrane. (a)** Fluorescence auto-correlation curve obtained from Alexa-680 labeled WGA protein in the extracellular solution (circle) and on the cell membrane (triangles). **Inset:** Image of cell membranes with Alexa-680 labeled WGA **(b)** Diffusion time distribution obtained from the data in (a).

**Figure S4. Different cells over several days show similar behavior.** Diffusion time distribution obtained from 14 different repeats of the experiment on 10 different cells, performed on three different days, for (a) 150 nM A $\beta$  concentration, which shows no large aggregates on membranes and (b) 350 nM A $\beta$  concentration, which shows a second peak at larger diffusion times on the membrane.

**Figure S5. *In vitro* fluorescence lifetime of aggregating A $\beta$ .** Time Correlated Single Photon Counting data of the fluorescence lifetime of 50  $\mu$ M fluorescein labeled A $\beta$  in pH 7.4 at time = 0 (circles) and time= 1 hr (triangles) after preparation, with their corresponding bi-exponential fits (black, time = 0 hr and grey, time = 1 hr). The bi-exponential fit at 0 hr yields lifetimes of 0.9 ns (14%) and 3.3 ns (86%),

whereas at 1 hr the lifetimes are 0.8 ns (20%) and 3.2 ns (80%).

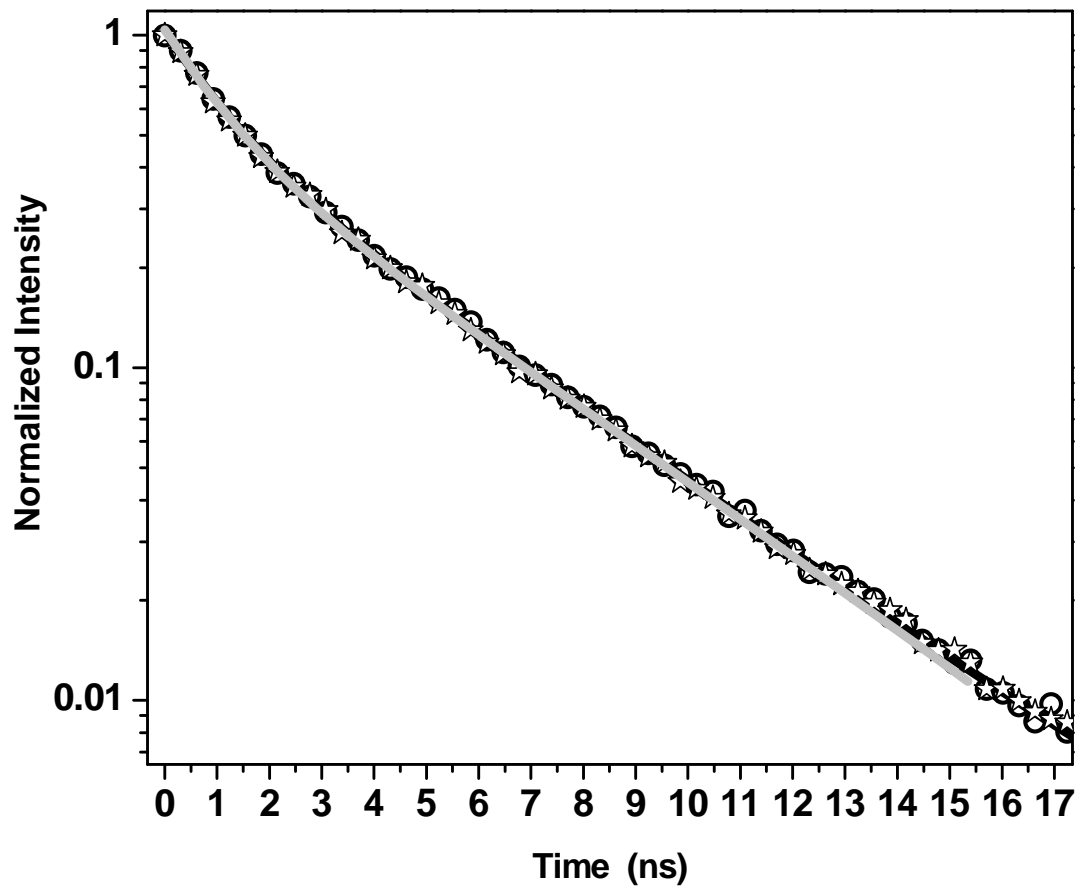

Figure S1

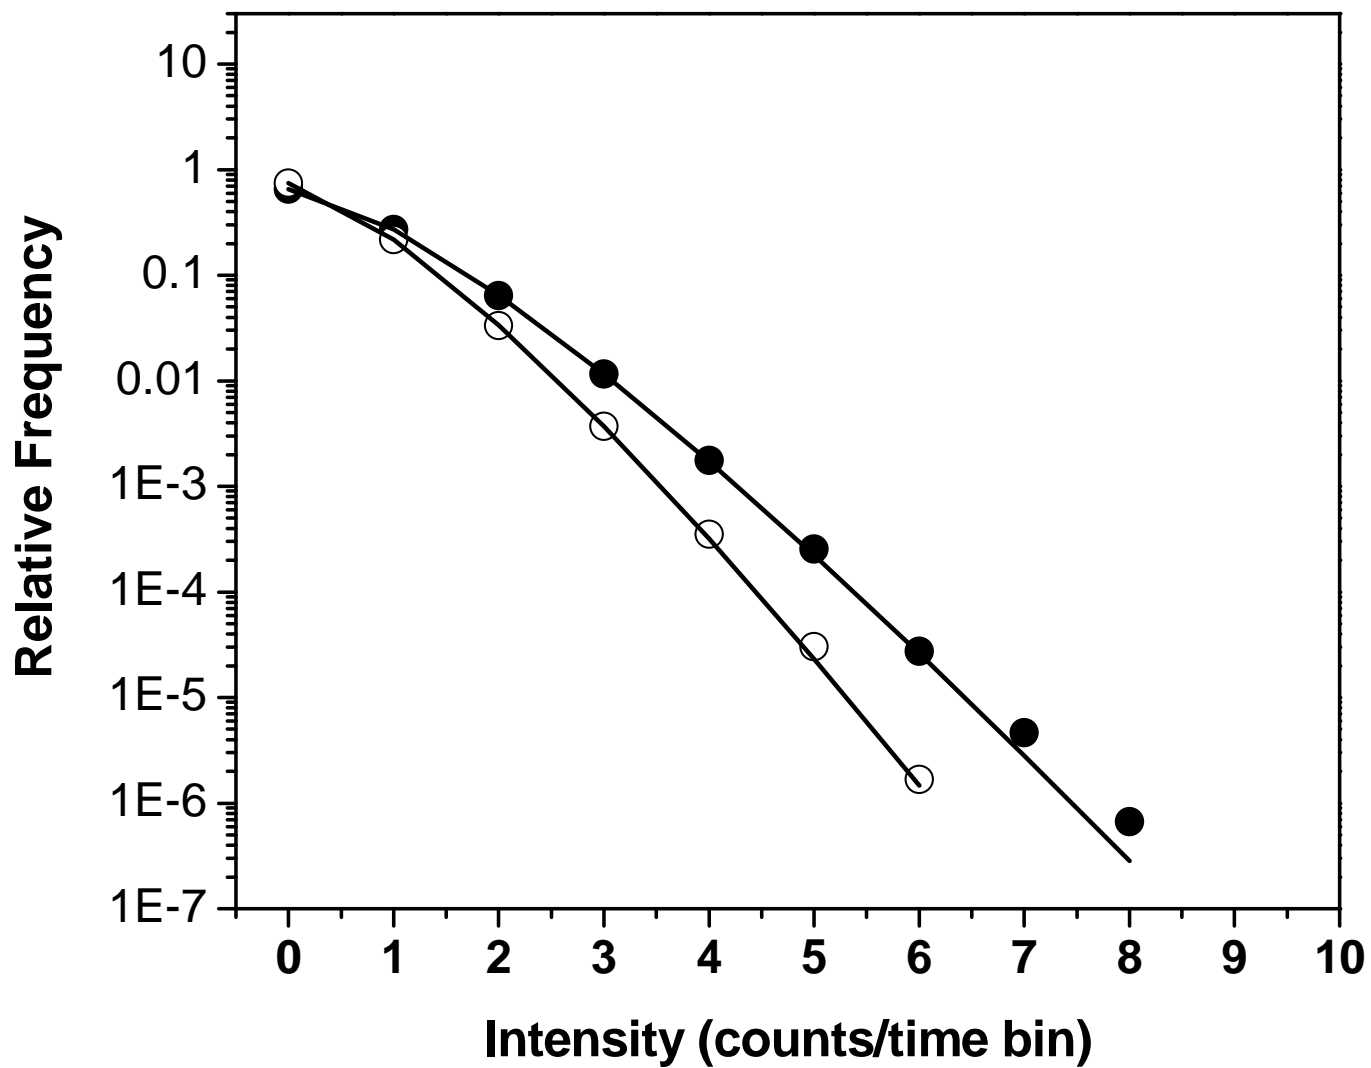

Figure S2

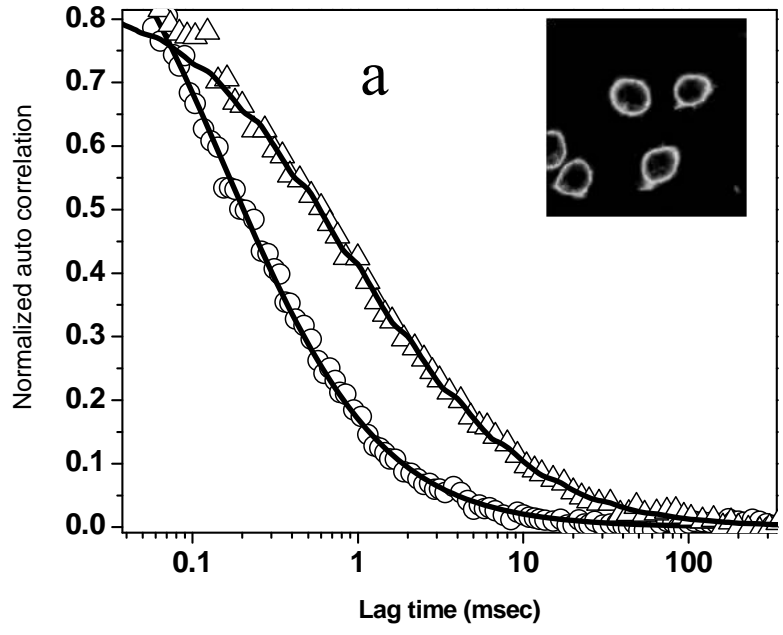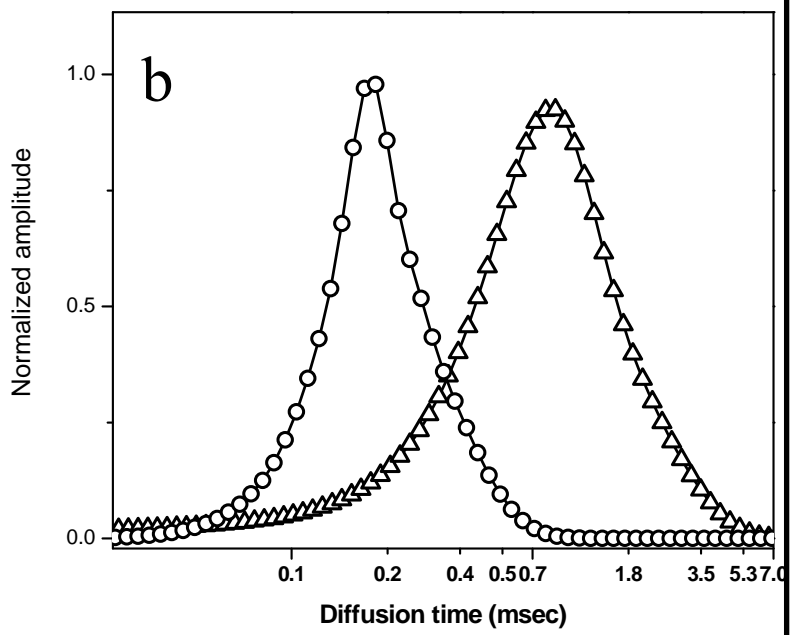

Figure S3

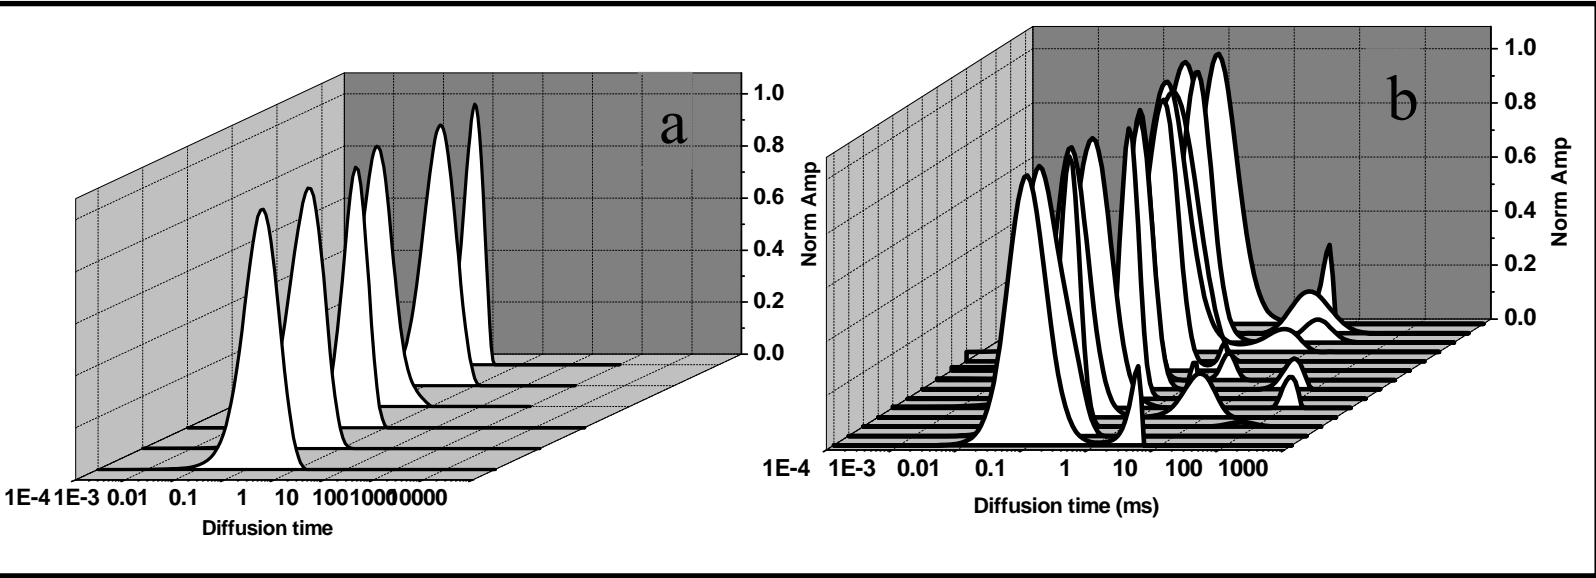

Figure S4

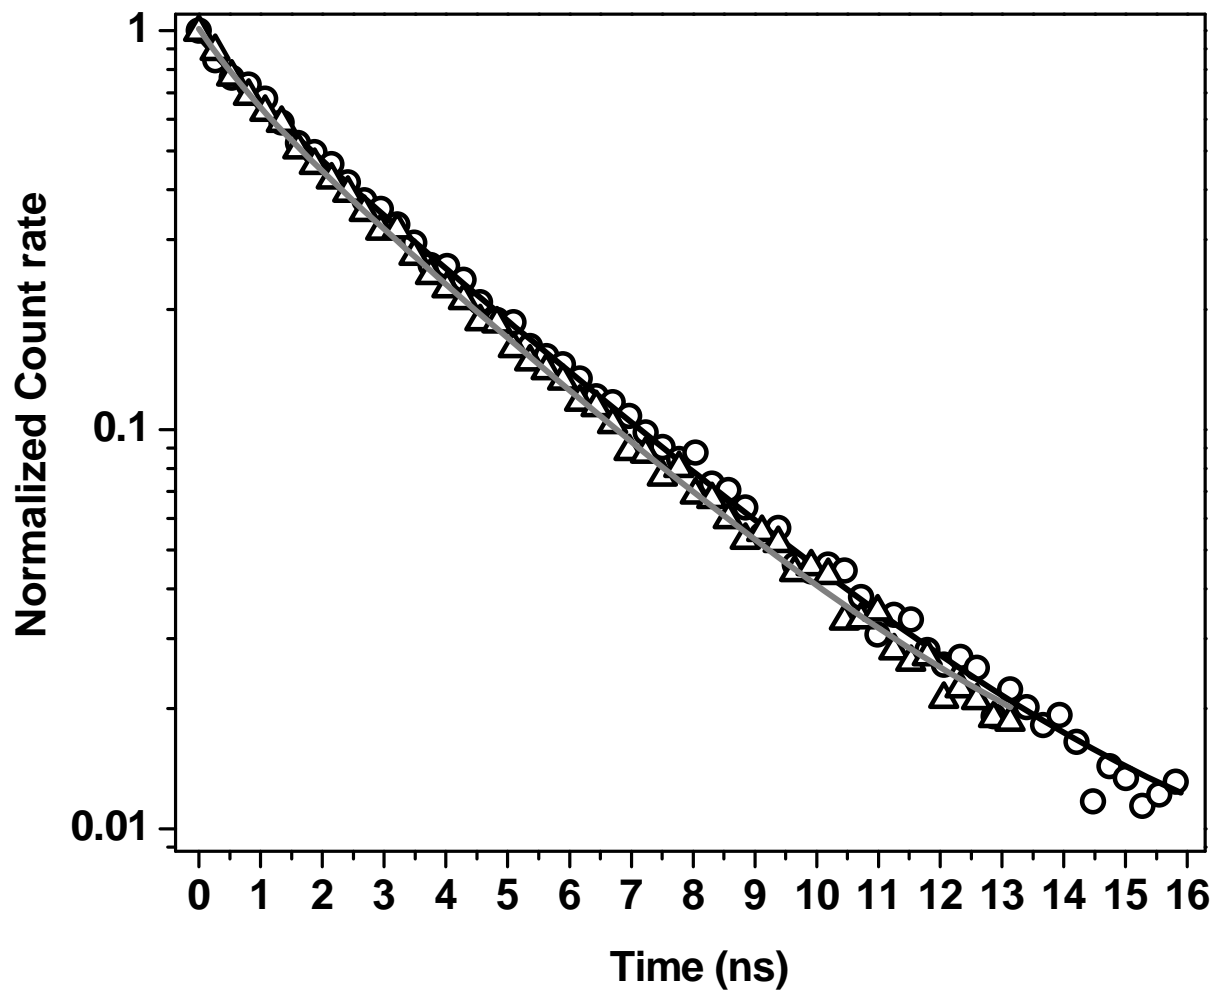

Figure S5
